# Supplementary material for: Association between the p.V37I variant of GJB2 and hearing loss: a pedigree and meta-analysis
Source: PubMed Central journal article supplement (PMC5542302; doi:10.18632/oncotarget.17325), 2017-04-21
Supplement: oncotarget-08-46681-s001.pdf [file oncotarget-08-46681-s001.pdf]

# Association between the p.V37I variant of *GJB2* and hearing loss: a pedigree and meta-analysis

## SUPPLEMENTARY MATERIALS

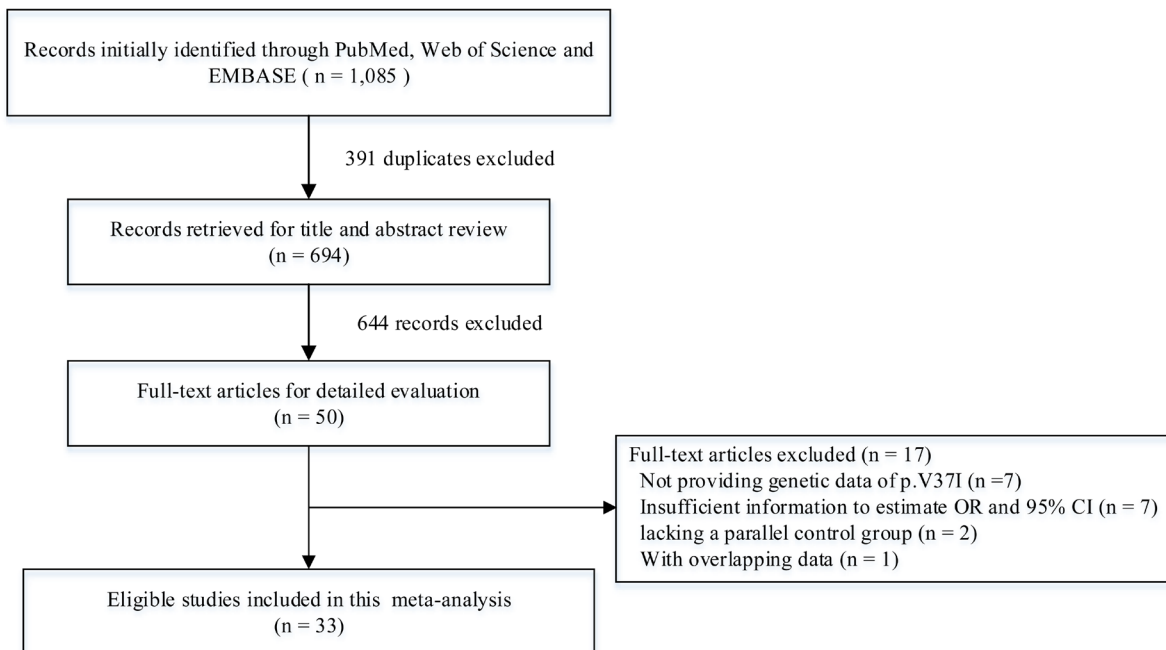

Supplementary Figure 1: A flow chart of literature search.

A. A allele versus G allele

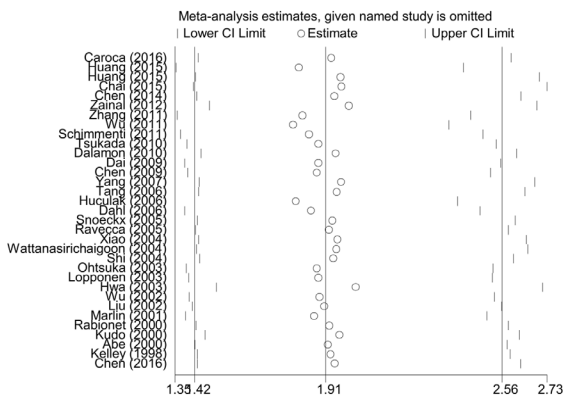

B. GA versus GG

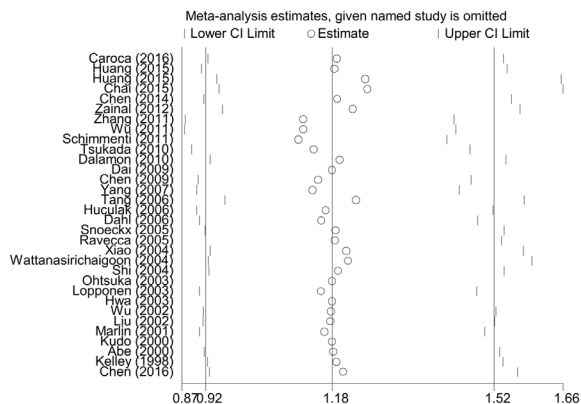

C. AA versus GG

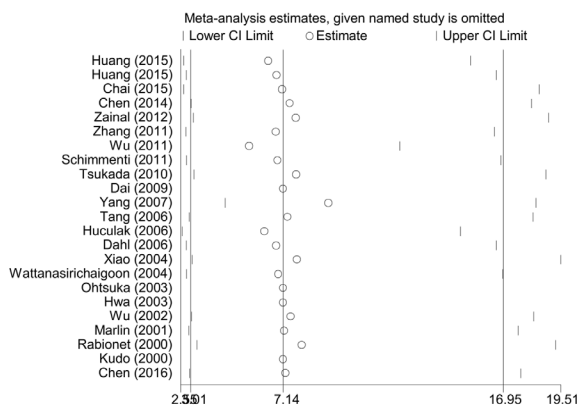

D. AA versus GA+GG (recessive model)

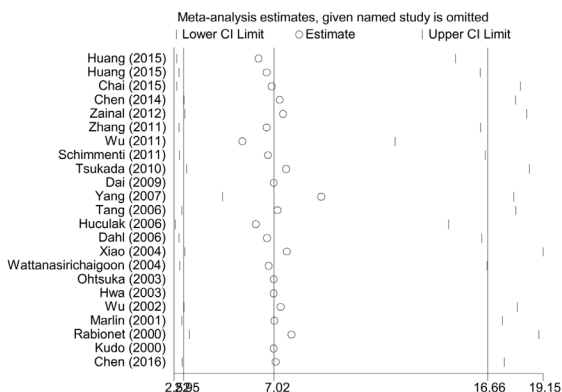

**Supplementary Figure 2: Sensitivity analyses of the effects of p.V37I on HL risk under the (A) allelic, (B and C) codominant, and (D) recessive models.**

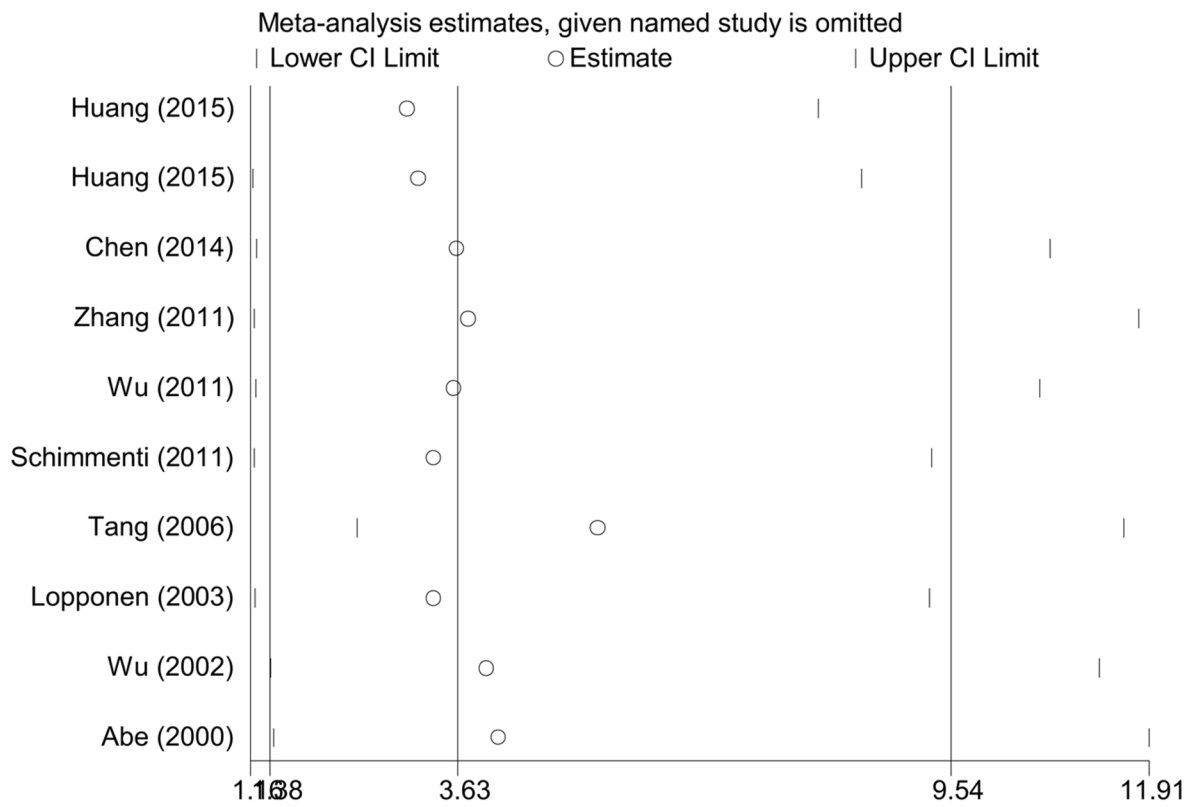

Supplementary Figure 3: Sensitivity analysis of the effects of compound heterozygous p.V37I variants on HL risk.

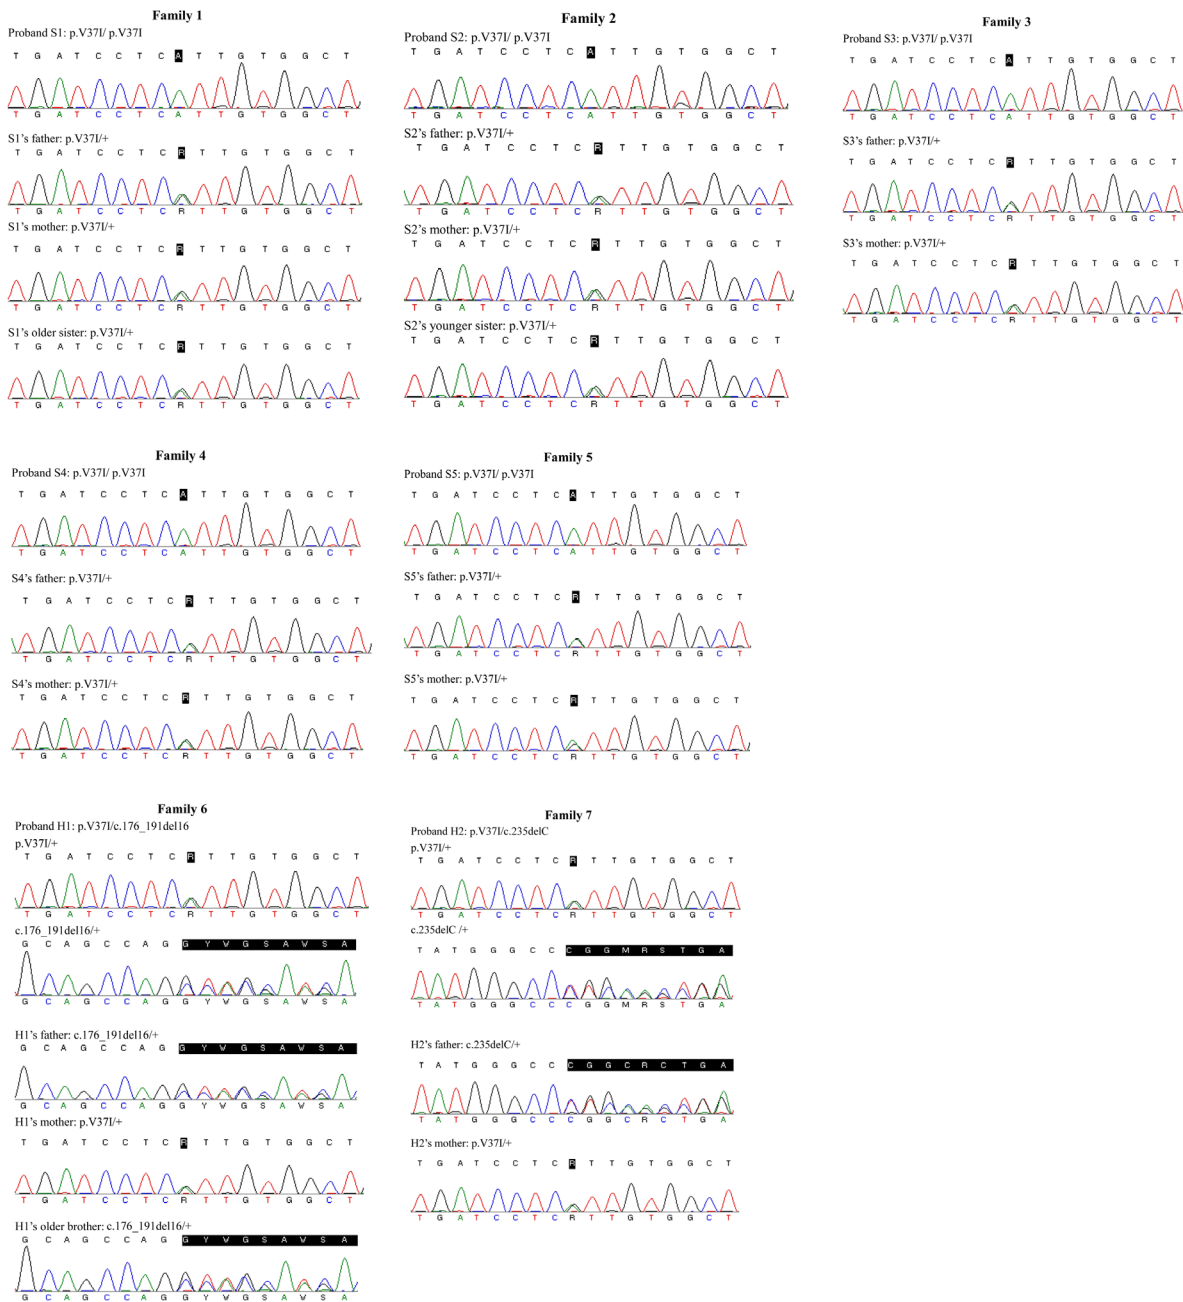

Supplementary Figure 4: Sanger sequencing results of pedigree analyses.

**Supplementary Table 1. Primers and PCR conditions used for mutation analyses**

See Supplementary File 1
